# Supplementary material
Source: bioRxiv or medRxiv preprint supplement (https://www.biorxiv.org/highwire/filestream/37984/field_highwire_adjunct_files/0/128454-1.pdf)
Supplement: Supplementary file [file 128454-1.pdf]

| ID          | Sex | Tissue ID | Group            | Start of gestational overlap (GD) | End of gestational overlap (GD) | Start of postnatal overlap (PND) | End of postnatal overlap (PND) |
|-------------|-----|-----------|------------------|-----------------------------------|---------------------------------|----------------------------------|--------------------------------|
| 21910258901 | M   | 72801     | F1 Male Veh-Cont | 0                                 | 15                              | 0                                | 8                              |
| 21910259001 | M   | 72501     | F1 Male Veh-Cont | no overlap                        | no overlap                      | no overlap                       | no overlap                     |
| 21910259101 | M   | 59101     | F1 Male Veh-Cont | no overlap                        | no overlap                      | no overlap                       | no overlap                     |
| 21910259201 | M   | 81501     | F1 Male Veh-Cont | no overlap                        | no overlap                      | no overlap                       | no overlap                     |
| 21910259301 | M   | 74201     | F1 Male Veh-Cont | no overlap                        | no overlap                      | no overlap                       | no overlap                     |
| 21910259401 | M   | 70301     | F1 Male Veh-Cont | no overlap                        | no overlap                      | no overlap                       | no overlap                     |
| 21910259501 | M   | 66201     | F1 Male Veh-Cont | no overlap                        | no overlap                      | no overlap                       | no overlap                     |
| 21910259601 | M   | 82301     | F1 Male Veh-Cont | no overlap                        | no overlap                      | no overlap                       | no overlap                     |
| 21910259701 | M   | 73501     | F1 Male Veh-Cont | no overlap                        | no overlap                      | no overlap                       | no overlap                     |
| 21910259801 | M   | 70401     | F1 Male Veh-Cont | no overlap                        | no overlap                      | no overlap                       | no overlap                     |
| 21910260901 | M   | 73001     | F1 Males2.5 BPA  | 0                                 | 16                              | 0                                | 10                             |
| 21910261001 | M   | 60601     | F1 Males2.5 BPA  | no overlap                        | no overlap                      | no overlap                       | no overlap                     |
| 21910261101 | M   | 72001     | F1 Males2.5 BPA  | no overlap                        | no overlap                      | no overlap                       | no overlap                     |
| 21910261201 | M   | 70201     | F1 Males2.5 BPA  | no overlap                        | no overlap                      | no overlap                       | no overlap                     |
| 21910261301 | M   | 61001     | F1 Males2.5 BPA  | no overlap                        | no overlap                      | no overlap                       | no overlap                     |
| 21910261501 | M   | 68401     | F1 Males2.5 BPA  | no overlap                        | no overlap                      | no overlap                       | no overlap                     |
| 21910261601 | M   | 81101     | F1 Males2.5 BPA  | no overlap                        | no overlap                      | no overlap                       | no overlap                     |
| 21910261701 | M   | 70601     | F1 Males2.5 BPA  | no overlap                        | no overlap                      | no overlap                       | no overlap                     |
| 21910262901 | M   | 67101     | F1 Male 25.0 BPA | 0                                 | 15                              | 0                                | 8                              |
| 21910263001 | M   | 71601     | F1 Male 25.0 BPA | 0                                 | 13                              | 0                                | 6                              |
| 21910263101 | M   | 60501     | F1 Male 25.0 BPA | no overlap                        | no overlap                      | no overlap                       | no overlap                     |
| 21910263201 | M   | 66401     | F1 Male 25.0 BPA | no overlap                        | no overlap                      | no overlap                       | no overlap                     |
| 21910263301 | M   | 63201     | F1 Male 25.0 BPA | no overlap                        | no overlap                      | no overlap                       | no overlap                     |
| 21910263401 | M   | 72301     | F1 Male 25.0 BPA | no overlap                        | no overlap                      | no overlap                       | no overlap                     |
| 21910263501 | M   | 65101     | F1 Male 25.0 BPA | no overlap                        | no overlap                      | no overlap                       | no overlap                     |
| 21910263701 | M   | 68201     | F1 Male 25.0 BPA | no overlap                        | no overlap                      | no overlap                       | no overlap                     |
| 21910264901 | M   | 81401     | F1 Male 250. BPA | 0                                 | 16                              | 0                                | 10                             |
| 21910265001 | M   | 71701     | F1 Male 250. BPA | no overlap                        | no overlap                      | no overlap                       | no overlap                     |
| 21910265101 | M   | 59201     | F1 Male 250. BPA | no overlap                        | no overlap                      | no overlap                       | no overlap                     |
| 21910265201 | M   | 62201     | F1 Male 250. BPA | no overlap                        | no overlap                      | no overlap                       | no overlap                     |
| 21910265301 | M   | 60401     | F1 Male 250. BPA | no overlap                        | no overlap                      | no overlap                       | no overlap                     |
| 21910265401 | M   | 67801     | F1 Male 250. BPA | no overlap                        | no overlap                      | no overlap                       | no overlap                     |
| 21910265501 | M   | 60201     | F1 Male 250. BPA | no overlap                        | no overlap                      | no overlap                       | no overlap                     |
| 21910265701 | M   | 65301     | F1 Male 250. BPA | no overlap                        | no overlap                      | no overlap                       | no overlap                     |
| 21910265801 | M   | 66101     | F1 Male 250. BPA | no overlap                        | no overlap                      | no overlap                       | no overlap                     |
| 21910266901 | M   | 62401     | F1 Male 2500.BPA | 0                                 | 14                              | 0                                | 7                              |
| 21910267001 | M   | 68601     | F1 Male 2500.BPA | 0                                 | 13                              | 0                                | 6                              |
| 21910267101 | M   | 70801     | F1 Male 2500.BPA | no overlap                        | no overlap                      | no overlap                       | no overlap                     |
| 21910267201 | M   | 69601     | F1 Male 2500.BPA | no overlap                        | no overlap                      | no overlap                       | no overlap                     |
| 21910267301 | M   | 67401     | F1 Male 2500.BPA | no overlap                        | no overlap                      | no overlap                       | no overlap                     |
| 21910267401 | M   | 61401     | F1 Male 2500.BPA | no overlap                        | no overlap                      | no overlap                       | no overlap                     |
| 21910267501 | M   | 62801     | F1 Male 2500.BPA | no overlap                        | no overlap                      | no overlap                       | no overlap                     |
| 21910267601 | M   | 71201     | F1 Male 2500.BPA | no overlap                        | no overlap                      | no overlap                       | no overlap                     |
| 21910267701 | M   | 64501     | F1 Male 2500.BPA | no overlap                        | no overlap                      | no overlap                       | no overlap                     |
| 21910267801 | M   | 61101     | F1 Male 2500.BPA | no overlap                        | no overlap                      | no overlap                       | no overlap                     |
| 21910268901 | M   | 72101     | F1 Male 25000.   | no overlap                        | no overlap                      | no overlap                       | no overlap                     |
| 21910269001 | M   | 63101     | F1 Male 25000.   | 0                                 | 14                              | 0                                | 8                              |
| 21910269101 | M   | 59501     | F1 Male 25000.   | no overlap                        | no overlap                      | no overlap                       | no overlap                     |
| 21910269201 | M   | 68301     | F1 Male 25000.   | no overlap                        | no overlap                      | no overlap                       | no overlap                     |
| 21910269301 | M   | 67201     | F1 Male 25000.   | no overlap                        | no overlap                      | no overlap                       | no overlap                     |
| 21910269401 | M   | 64601     | F1 Male 25000.   | no overlap                        | no overlap                      | no overlap                       | no overlap                     |
| 21910269501 | M   | 60801     | F1 Male 25000.   | no overlap                        | no overlap                      | no overlap                       | no overlap                     |
| 21910269601 | M   | 73401     | F1 Male 25000.   | no overlap                        | no overlap                      | no overlap                       | no overlap                     |
| 21910269701 | M   | 61301     | F1 Male 25000.   | no overlap                        | no overlap                      | no overlap                       | no overlap                     |
| 21910269801 | M   | 59301     | F1 Male 25000.   | no overlap                        | no overlap                      | no overlap                       | no overlap                     |
| 21910270901 | M   | 66601     | F1 Male .05 EE2  | 0                                 | 16                              | 0                                | 10                             |
| 21910271001 | M   | 64301     | F1 Male .05 EE2  | 0                                 | 16                              | 0                                | 10                             |
| 21910271101 | M   | 66301     | F1 Male .05 EE2  | 0                                 | 14                              | 0                                | 7                              |
| 21910271201 | M   | 70001     | F1 Male .05 EE2  | no overlap                        | no overlap                      | no overlap                       | no overlap                     |
| 21910271301 | M   | 67501     | F1 Male .05 EE2  | no overlap                        | no overlap                      | no overlap                       | no overlap                     |
| 21910271401 | M   | 81201     | F1 Male .05 EE2  | no overlap                        | no overlap                      | no overlap                       | no overlap                     |
| 21910271501 | M   | 69801     | F1 Male .05 EE2  | no overlap                        | no overlap                      | no overlap                       | no overlap                     |
| 21910271601 | M   | 61201     | F1 Male .05 EE2  | no overlap                        | no overlap                      | no overlap                       | no overlap                     |
| 21910271701 | M   | 70701     | F1 Male .05 EE2  | no overlap                        | no overlap                      | no overlap                       | no overlap                     |
| 21910271801 | M   | 65801     | F1 Male .05 EE2  | no overlap                        | no overlap                      | no overlap                       | no overlap                     |
| 21910272901 | M   | 80901     | F1 Male .5 EE2   | no overlap                        | no overlap                      | no overlap                       | no overlap                     |
| 21910273001 | M   | 60101     | F1 Male .5 EE2   | no overlap                        | no overlap                      | no overlap                       | no overlap                     |
| 21910273101 | M   | 64201     | F1 Male .5 EE2   | no overlap                        | no overlap                      | no overlap                       | no overlap                     |
| 21910273201 | M   | 74301     | F1 Male .5 EE2   | no overlap                        | no overlap                      | no overlap                       | no overlap                     |
| 21910273301 | M   | 69101     | F1 Male .5 EE2   | no overlap                        | no overlap                      | no overlap                       | no overlap                     |
| 21910273401 | M   | 67301     | F1 Male .5 EE2   | no overlap                        | no overlap                      | no overlap                       | no overlap                     |
| 21910273501 | M   | 80501     | F1 Male .5 EE2   | no overlap                        | no overlap                      | no overlap                       | no overlap                     |
| 21910273601 | M   | 59601     | F1 Male .5 EE2   | no overlap                        | no overlap                      | no overlap                       | no overlap                     |
| 21910273701 | M   | 68501     | F1 Male .5 EE2   | no overlap                        | no overlap                      | no overlap                       | no overlap                     |
| 21910273801 | M   | 63501     | F1 Male .5 EE2   | no overlap                        | no overlap                      | no overlap                       | no overlap                     |

| CID         | Sex | Tissue ID | Group            | Start of gestational<br>overlap (GD) | End of gestational<br>overlap (GD) | Start of postnatal<br>overlap (PND) | End of postnatal<br>overlap (PND) |
|-------------|-----|-----------|------------------|--------------------------------------|------------------------------------|-------------------------------------|-----------------------------------|
| 21910259901 | F   | 73801     | F1 Fem. Veh-Cont | no overlap                           | no overlap                         | no overlap                          | no overlap                        |
| 21910260001 | F   | 80701     | F1 Fem. Veh-Cont | no overlap                           | no overlap                         | no overlap                          | no overlap                        |
| 21910260101 | F   | 61501     | F1 Fem. Veh-Cont | no overlap                           | no overlap                         | no overlap                          | no overlap                        |
| 21910260201 | F   | 64801     | F1 Fem. Veh-Cont | no overlap                           | no overlap                         | no overlap                          | no overlap                        |
| 21910260301 | F   | 64001     | F1 Fem. Veh-Cont | no overlap                           | no overlap                         | no overlap                          | no overlap                        |
| 21910260401 | F   | 69501     | F1 Fem. Veh-Cont | no overlap                           | no overlap                         | no overlap                          | no overlap                        |
| 21910260501 | F   | 63401     | F1 Fem. Veh-Cont | no overlap                           | no overlap                         | no overlap                          | no overlap                        |
| 21910260601 | F   | 66501     | F1 Fem. Veh-Cont | no overlap                           | no overlap                         | no overlap                          | no overlap                        |
| 21910260701 | F   | 60301     | F1 Fem. Veh-Cont | no overlap                           | no overlap                         | no overlap                          | no overlap                        |
| 21910260801 | F   | 61701     | F1 Fem. Veh-Cont | no overlap                           | no overlap                         | no overlap                          | no overlap                        |
| 21910261901 | F   | 69401     | F1 Fem. 2.5 BPA  | no overlap                           | no overlap                         | no overlap                          | no overlap                        |
| 21910262001 | F   | 81701     | F1 Fem. 2.5 BPA  | no overlap                           | no overlap                         | no overlap                          | no overlap                        |
| 21910262101 | F   | 63701     | F1 Fem. 2.5 BPA  | no overlap                           | no overlap                         | no overlap                          | no overlap                        |
| 21910262201 | F   | 65001     | F1 Fem. 2.5 BPA  | no overlap                           | no overlap                         | no overlap                          | no overlap                        |
| 21910262301 | F   | 72401     | F1 Fem. 2.5 BPA  | no overlap                           | no overlap                         | no overlap                          | no overlap                        |
| 21910262401 | F   | 72701     | F1 Fem. 2.5 BPA  | no overlap                           | no overlap                         | no overlap                          | no overlap                        |
| 21910262501 | F   | 65501     | F1 Fem. 2.5 BPA  | no overlap                           | no overlap                         | no overlap                          | no overlap                        |
| 21910262601 | F   | 65201     | F1 Fem. 2.5 BPA  | no overlap                           | no overlap                         | no overlap                          | no overlap                        |
| 21910262701 | F   | 64401     | F1 Fem. 2.5 BPA  | no overlap                           | no overlap                         | no overlap                          | no overlap                        |
| 21910262801 | F   | 64701     | F1 Fem. 2.5 BPA  | no overlap                           | no overlap                         | no overlap                          | no overlap                        |
| 21910263901 | F   | 59001     | F1 Fem. 25.0 BPA | no overlap                           | no overlap                         | no overlap                          | no overlap                        |
| 21910264001 | F   | 80601     | F1 Fem. 25.0 BPA | no overlap                           | no overlap                         | no overlap                          | no overlap                        |
| 21910264101 | F   | 74401     | F1 Fem. 25.0 BPA | no overlap                           | no overlap                         | no overlap                          | no overlap                        |
| 21910264201 | F   | 70101     | F1 Fem. 25.0 BPA | no overlap                           | no overlap                         | no overlap                          | no overlap                        |
| 21910264301 | F   | 60701     | F1 Fem. 25.0 BPA | no overlap                           | no overlap                         | no overlap                          | no overlap                        |
| 21910264401 | F   | 73101     | F1 Fem. 25.0 BPA | no overlap                           | no overlap                         | no overlap                          | no overlap                        |
| 21910264501 | F   | 61601     | F1 Fem. 25.0 BPA | no overlap                           | no overlap                         | no overlap                          | no overlap                        |
| 21910264601 | F   | 73201     | F1 Fem. 25.0 BPA | no overlap                           | no overlap                         | no overlap                          | no overlap                        |
| 21910264701 | F   | 63801     | F1 Fem. 25.0 BPA | no overlap                           | no overlap                         | no overlap                          | no overlap                        |
| 21910264801 | F   | 62001     | F1 Fem. 25.0 BPA | no overlap                           | no overlap                         | no overlap                          | no overlap                        |
| 21910265901 | F   | 66801     | F1 Fem. 250. BPA | 0                                    | 16                                 | 0                                   | 9                                 |
| 21910266001 | F   | 73701     | F1 Fem. 250. BPA | no overlap                           | no overlap                         | no overlap                          | no overlap                        |
| 21910266101 | F   | 81801     | F1 Fem. 250. BPA | no overlap                           | no overlap                         | no overlap                          | no overlap                        |
| 21910266201 | F   | 70501     | F1 Fem. 250. BPA | no overlap                           | no overlap                         | no overlap                          | no overlap                        |
| 21910266301 | F   | 66001     | F1 Fem. 250. BPA | no overlap                           | no overlap                         | no overlap                          | no overlap                        |
| 21910266401 | F   | 71401     | F1 Fem. 250. BPA | no overlap                           | no overlap                         | no overlap                          | no overlap                        |
| 21910266501 | F   | 73301     | F1 Fem. 250. BPA | no overlap                           | no overlap                         | no overlap                          | no overlap                        |
| 21910266601 | F   | 62701     | F1 Fem. 250. BPA | no overlap                           | no overlap                         | no overlap                          | no overlap                        |
| 21910266701 | F   | 60001     | F1 Fem. 250. BPA | no overlap                           | no overlap                         | no overlap                          | no overlap                        |
| 21910266801 | F   | 71801     | F1 Fem. 250. BPA | no overlap                           | no overlap                         | no overlap                          | no overlap                        |
| 21910267901 | F   | 71301     | F1 Fem. 2500.BPA | 0                                    | 16                                 | 0                                   | 10                                |
| 21910268001 | F   | 62101     | F1 Fem. 2500.BPA | no overlap                           | no overlap                         | no overlap                          | no overlap                        |
| 21910268101 | F   | 59901     | F1 Fem. 2500.BPA | no overlap                           | no overlap                         | no overlap                          | no overlap                        |
| 21910268201 | F   | 71501     | F1 Fem. 2500.BPA | no overlap                           | no overlap                         | no overlap                          | no overlap                        |
| 21910268301 | F   | 68801     | F1 Fem. 2500.BPA | no overlap                           | no overlap                         | no overlap                          | no overlap                        |
| 21910268401 | F   | 82001     | F1 Fem. 2500.BPA | no overlap                           | no overlap                         | no overlap                          | no overlap                        |
| 21910268501 | F   | 63301     | F1 Fem. 2500.BPA | no overlap                           | no overlap                         | no overlap                          | no overlap                        |
| 21910268601 | F   | 67701     | F1 Fem. 2500.BPA | no overlap                           | no overlap                         | no overlap                          | no overlap                        |
| 21910269901 | F   | 74701     | F1 Fem. 25000.   | 0                                    | 16                                 | 0                                   | 10                                |
| 21910270001 | F   | 59401     | F1 Fem. 25000.   | no overlap                           | no overlap                         | no overlap                          | no overlap                        |
| 21910270101 | F   | 73601     | F1 Fem. 25000.   | no overlap                           | no overlap                         | no overlap                          | no overlap                        |
| 21910270201 | F   | 81301     | F1 Fem. 25000.   | no overlap                           | no overlap                         | no overlap                          | no overlap                        |
| 21910270301 | F   | 63601     | F1 Fem. 25000.   | no overlap                           | no overlap                         | no overlap                          | no overlap                        |
| 21910270401 | F   | 62501     | F1 Fem. 25000.   | no overlap                           | no overlap                         | no overlap                          | no overlap                        |
| 21910270501 | F   | 81001     | F1 Fem. 25000.   | no overlap                           | no overlap                         | no overlap                          | no overlap                        |
| 21910270601 | F   | 65401     | F1 Fem. 25000.   | no overlap                           | no overlap                         | no overlap                          | no overlap                        |
| 21910270701 | F   | 68101     | F1 Fem. 25000.   | no overlap                           | no overlap                         | no overlap                          | no overlap                        |
| 21910270801 | F   | 82201     | F1 Fem. 25000.   | no overlap                           | no overlap                         | no overlap                          | no overlap                        |
| 21910271901 | F   | 62301     | F1 Fem. .05 EE2  | 0                                    | 16                                 | 0                                   | 10                                |
| 21910272001 | F   | 63901     | F1 Fem. .05 EE2  | no overlap                           | no overlap                         | no overlap                          | no overlap                        |
| 21910272101 | F   | 69301     | F1 Fem. .05 EE2  | no overlap                           | no overlap                         | no overlap                          | no overlap                        |
| 21910272201 | F   | 59701     | F1 Fem. .05 EE2  | no overlap                           | no overlap                         | no overlap                          | no overlap                        |
| 21910272301 | F   | 67601     | F1 Fem. .05 EE2  | no overlap                           | no overlap                         | no overlap                          | no overlap                        |
| 21910272401 | F   | 80801     | F1 Fem. .05 EE2  | no overlap                           | no overlap                         | no overlap                          | no overlap                        |
| 21910272501 | F   | 81601     | F1 Fem. .05 EE2  | no overlap                           | no overlap                         | no overlap                          | no overlap                        |
| 21910272601 | F   | 65601     | F1 Fem. .05 EE2  | no overlap                           | no overlap                         | no overlap                          | no overlap                        |
| 21910272701 | F   | 74601     | F1 Fem. .05 EE2  | no overlap                           | no overlap                         | no overlap                          | no overlap                        |
| 21910272801 | F   | 81901     | F1 Fem. .05 EE2  | no overlap                           | no overlap                         | no overlap                          | no overlap                        |
| 21910273901 | F   | 82101     | F1 Fem. .5 EE2   | 0                                    | 16                                 | 0                                   | 10                                |
| 21910274001 | F   | 72201     | F1 Fem. .5 EE2   | 0                                    | 16                                 | 0                                   | 10                                |
| 21910274101 | F   | 64101     | F1 Fem. .5 EE2   | no overlap                           | no overlap                         | no overlap                          | no overlap                        |
| 21910274201 | F   | 72901     | F1 Fem. .5 EE2   | no overlap                           | no overlap                         | no overlap                          | no overlap                        |
| 21910274301 | F   | 61801     | F1 Fem. .5 EE2   | no overlap                           | no overlap                         | no overlap                          | no overlap                        |
| 21910274401 | F   | 66701     | F1 Fem. .5 EE2   | no overlap                           | no overlap                         | no overlap                          | no overlap                        |
| 21910274501 | F   | 74801     | F1 Fem. .5 EE2   | no overlap                           | no overlap                         | no overlap                          | no overlap                        |
| 21910274601 | F   | 69701     | F1 Fem. .5 EE2   | no overlap                           | no overlap                         | no overlap                          | no overlap                        |
| 21910274701 | F   | 65701     | F1 Fem. .5 EE2   | no overlap                           | no overlap                         | no overlap                          | no overlap                        |

|             |   |       |                |            |            |            |            |
|-------------|---|-------|----------------|------------|------------|------------|------------|
| 21910274801 | F | 68001 | F1 Fem. .5 EE2 | no overlap | no overlap | no overlap | no overlap |
|-------------|---|-------|----------------|------------|------------|------------|------------|
